# Supplementary material for: Predictive mapping of organic carbon stocks and accumulation rates in surficial sediments of the Canadian continental margin
Source: Copernicus journal article supplement (doi:10.5194/essd-2023-295), 2023-10-16

## **Description**

The following plots show the final set of predictor variables available for predictive mapping of seafloor sediments across Canada. All plots are shown with the x-axis indicating the Longitude and y-axis the Latitude within the co-ordinate reference system EPSG:3573 WGS 84 - North Pole Lambert Azimuthal Equal Area Canada. The final resolution of all raster layers is 200 m x 200 m; however, they cannot be visually reproduced at this resolution at their full extent, therefore the display of the data inherently includes some aggregation. Plots are predominantly shown with a continuous colour scale from low values in grey and high values in green. Bioregion is shown as 12 discrete categories (see Table 2 of main text); BPI (benthic position index), VRM (vector ruggedness measure) and curvature measures are shown in quantile groups to better visualise spatial contrasts in the data. For some of the plots shown in a continuous colour scale, the delineation between lower values may not be visually apparent due to highly right skewed data. For further information on the methods and data sources see Table 1 and Sections 2.2 and 2.3 of the main text.

**Bathymetry (m)**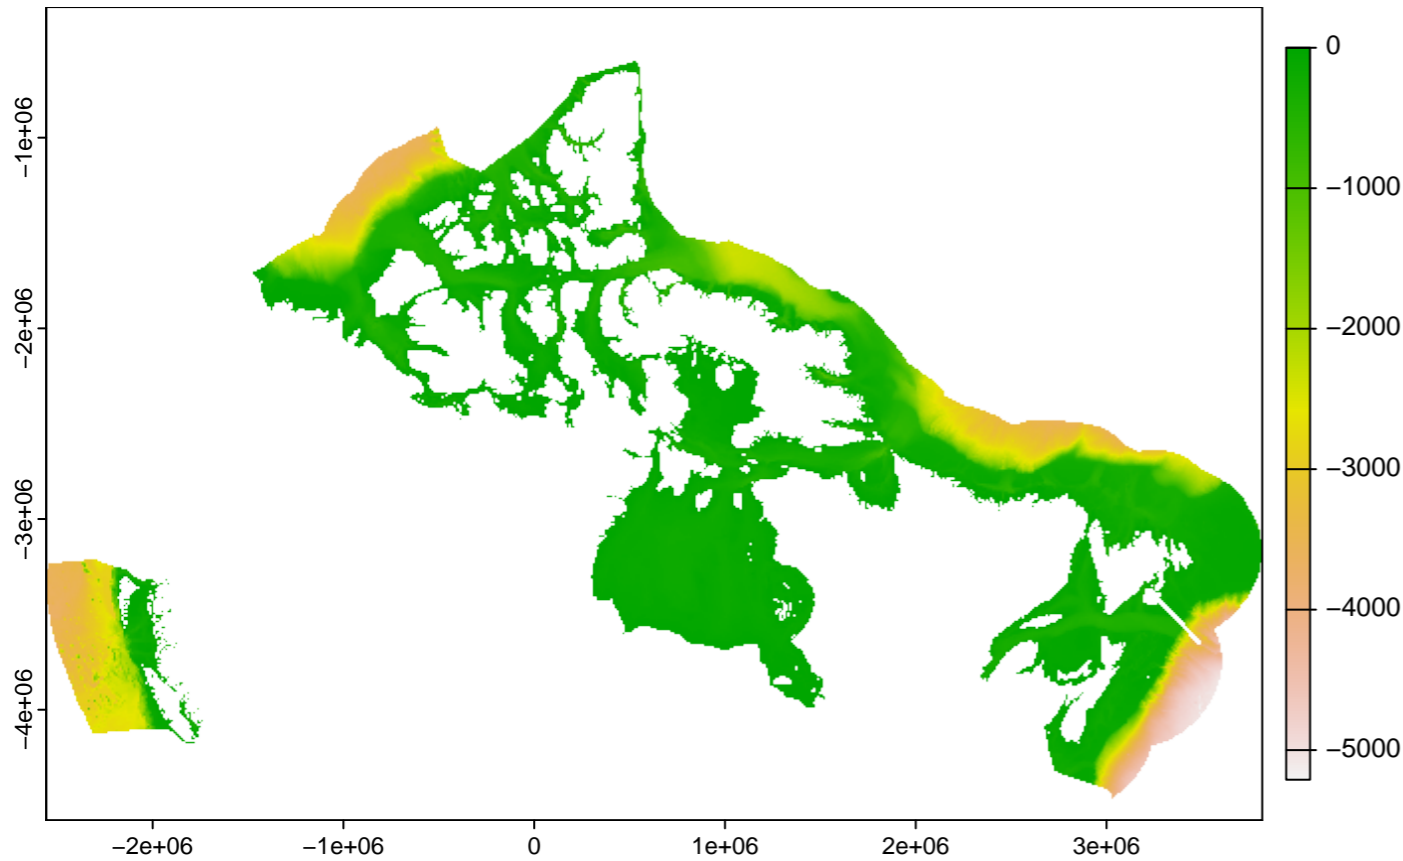**Maximum current velocity – seafloor (m/s)**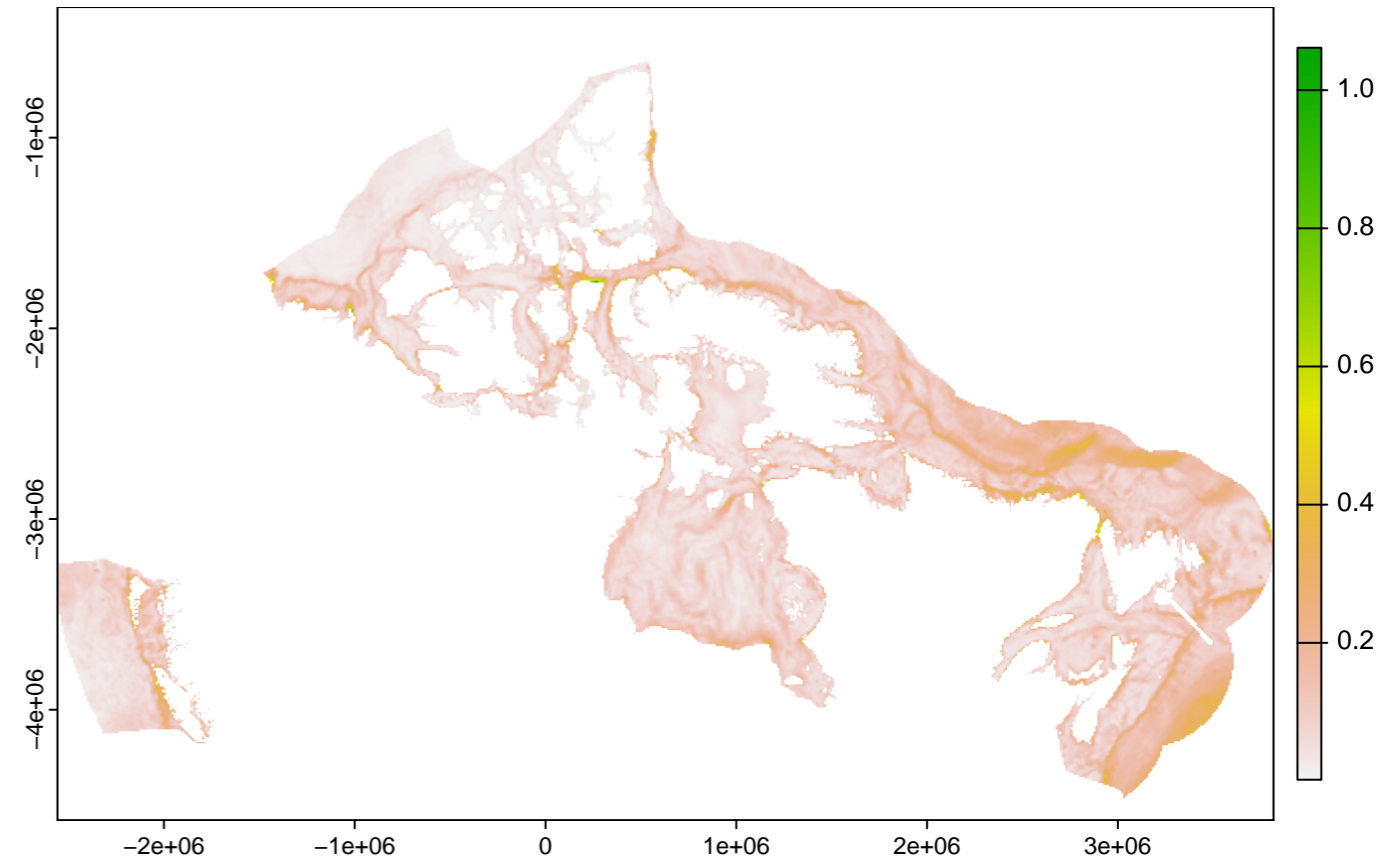**Disolved oxygen – seafloor (mol/m^3)**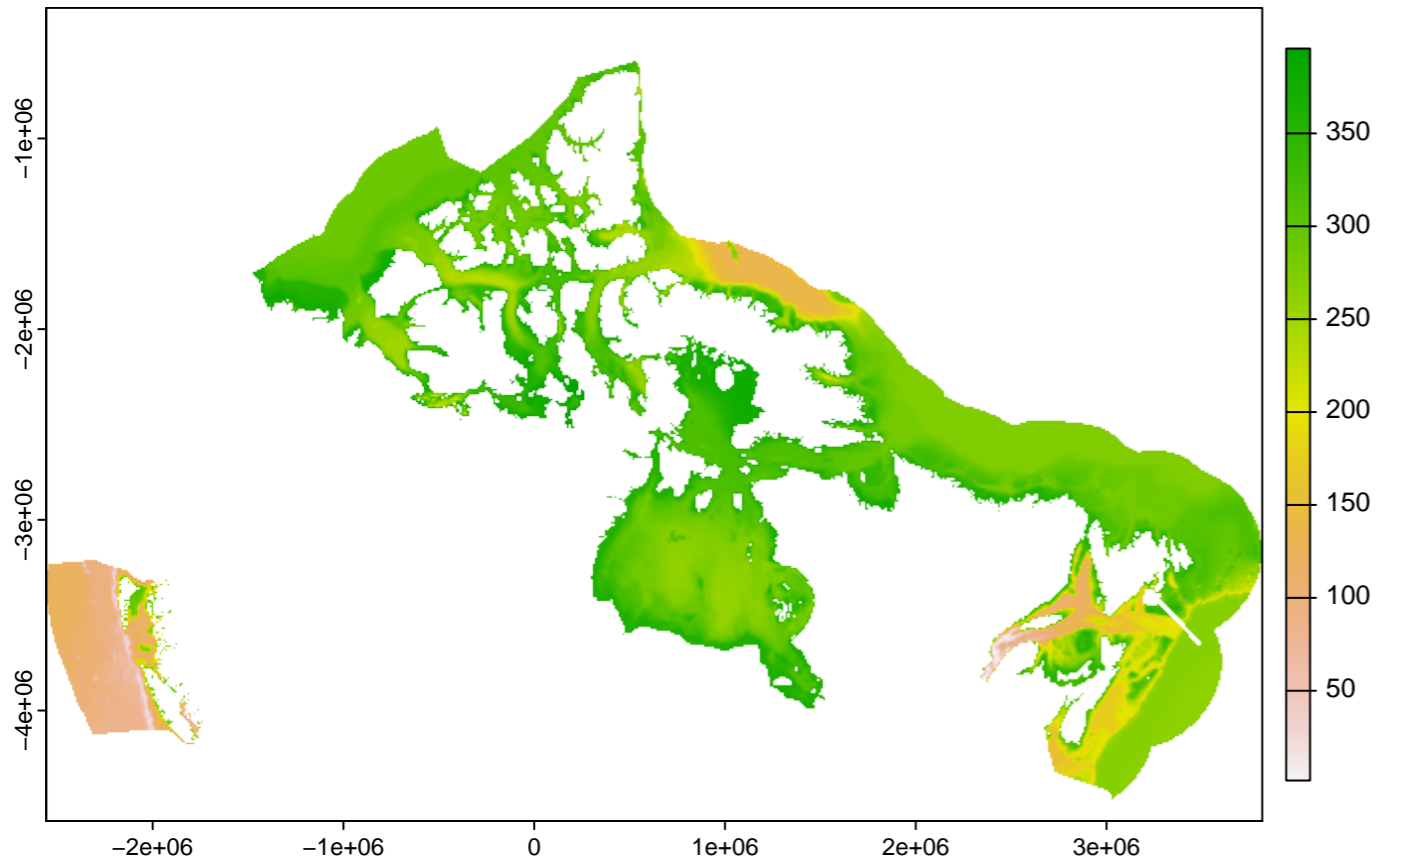**Chlorophyll concentration – surface (mg/m^3)**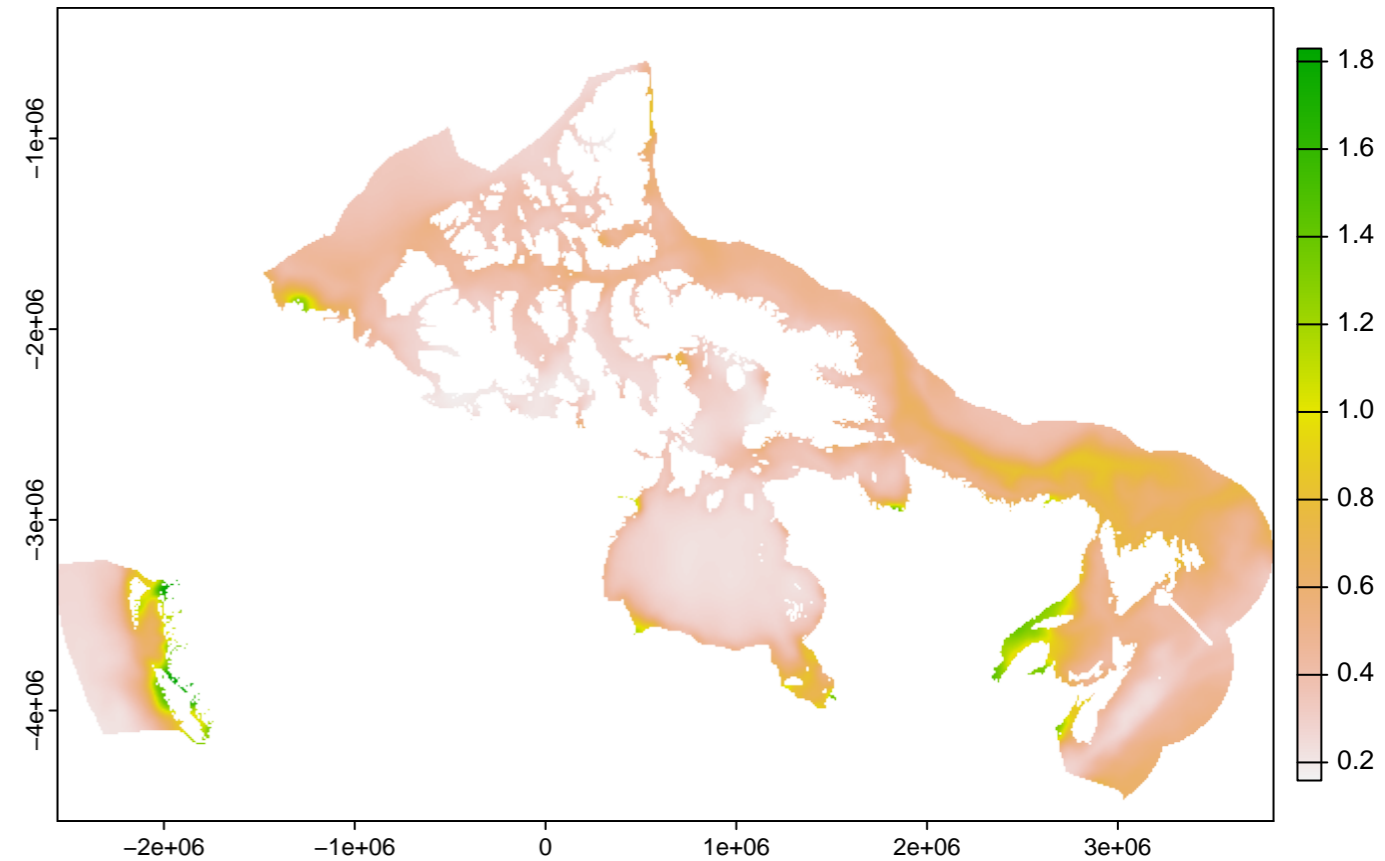

# Bioregion

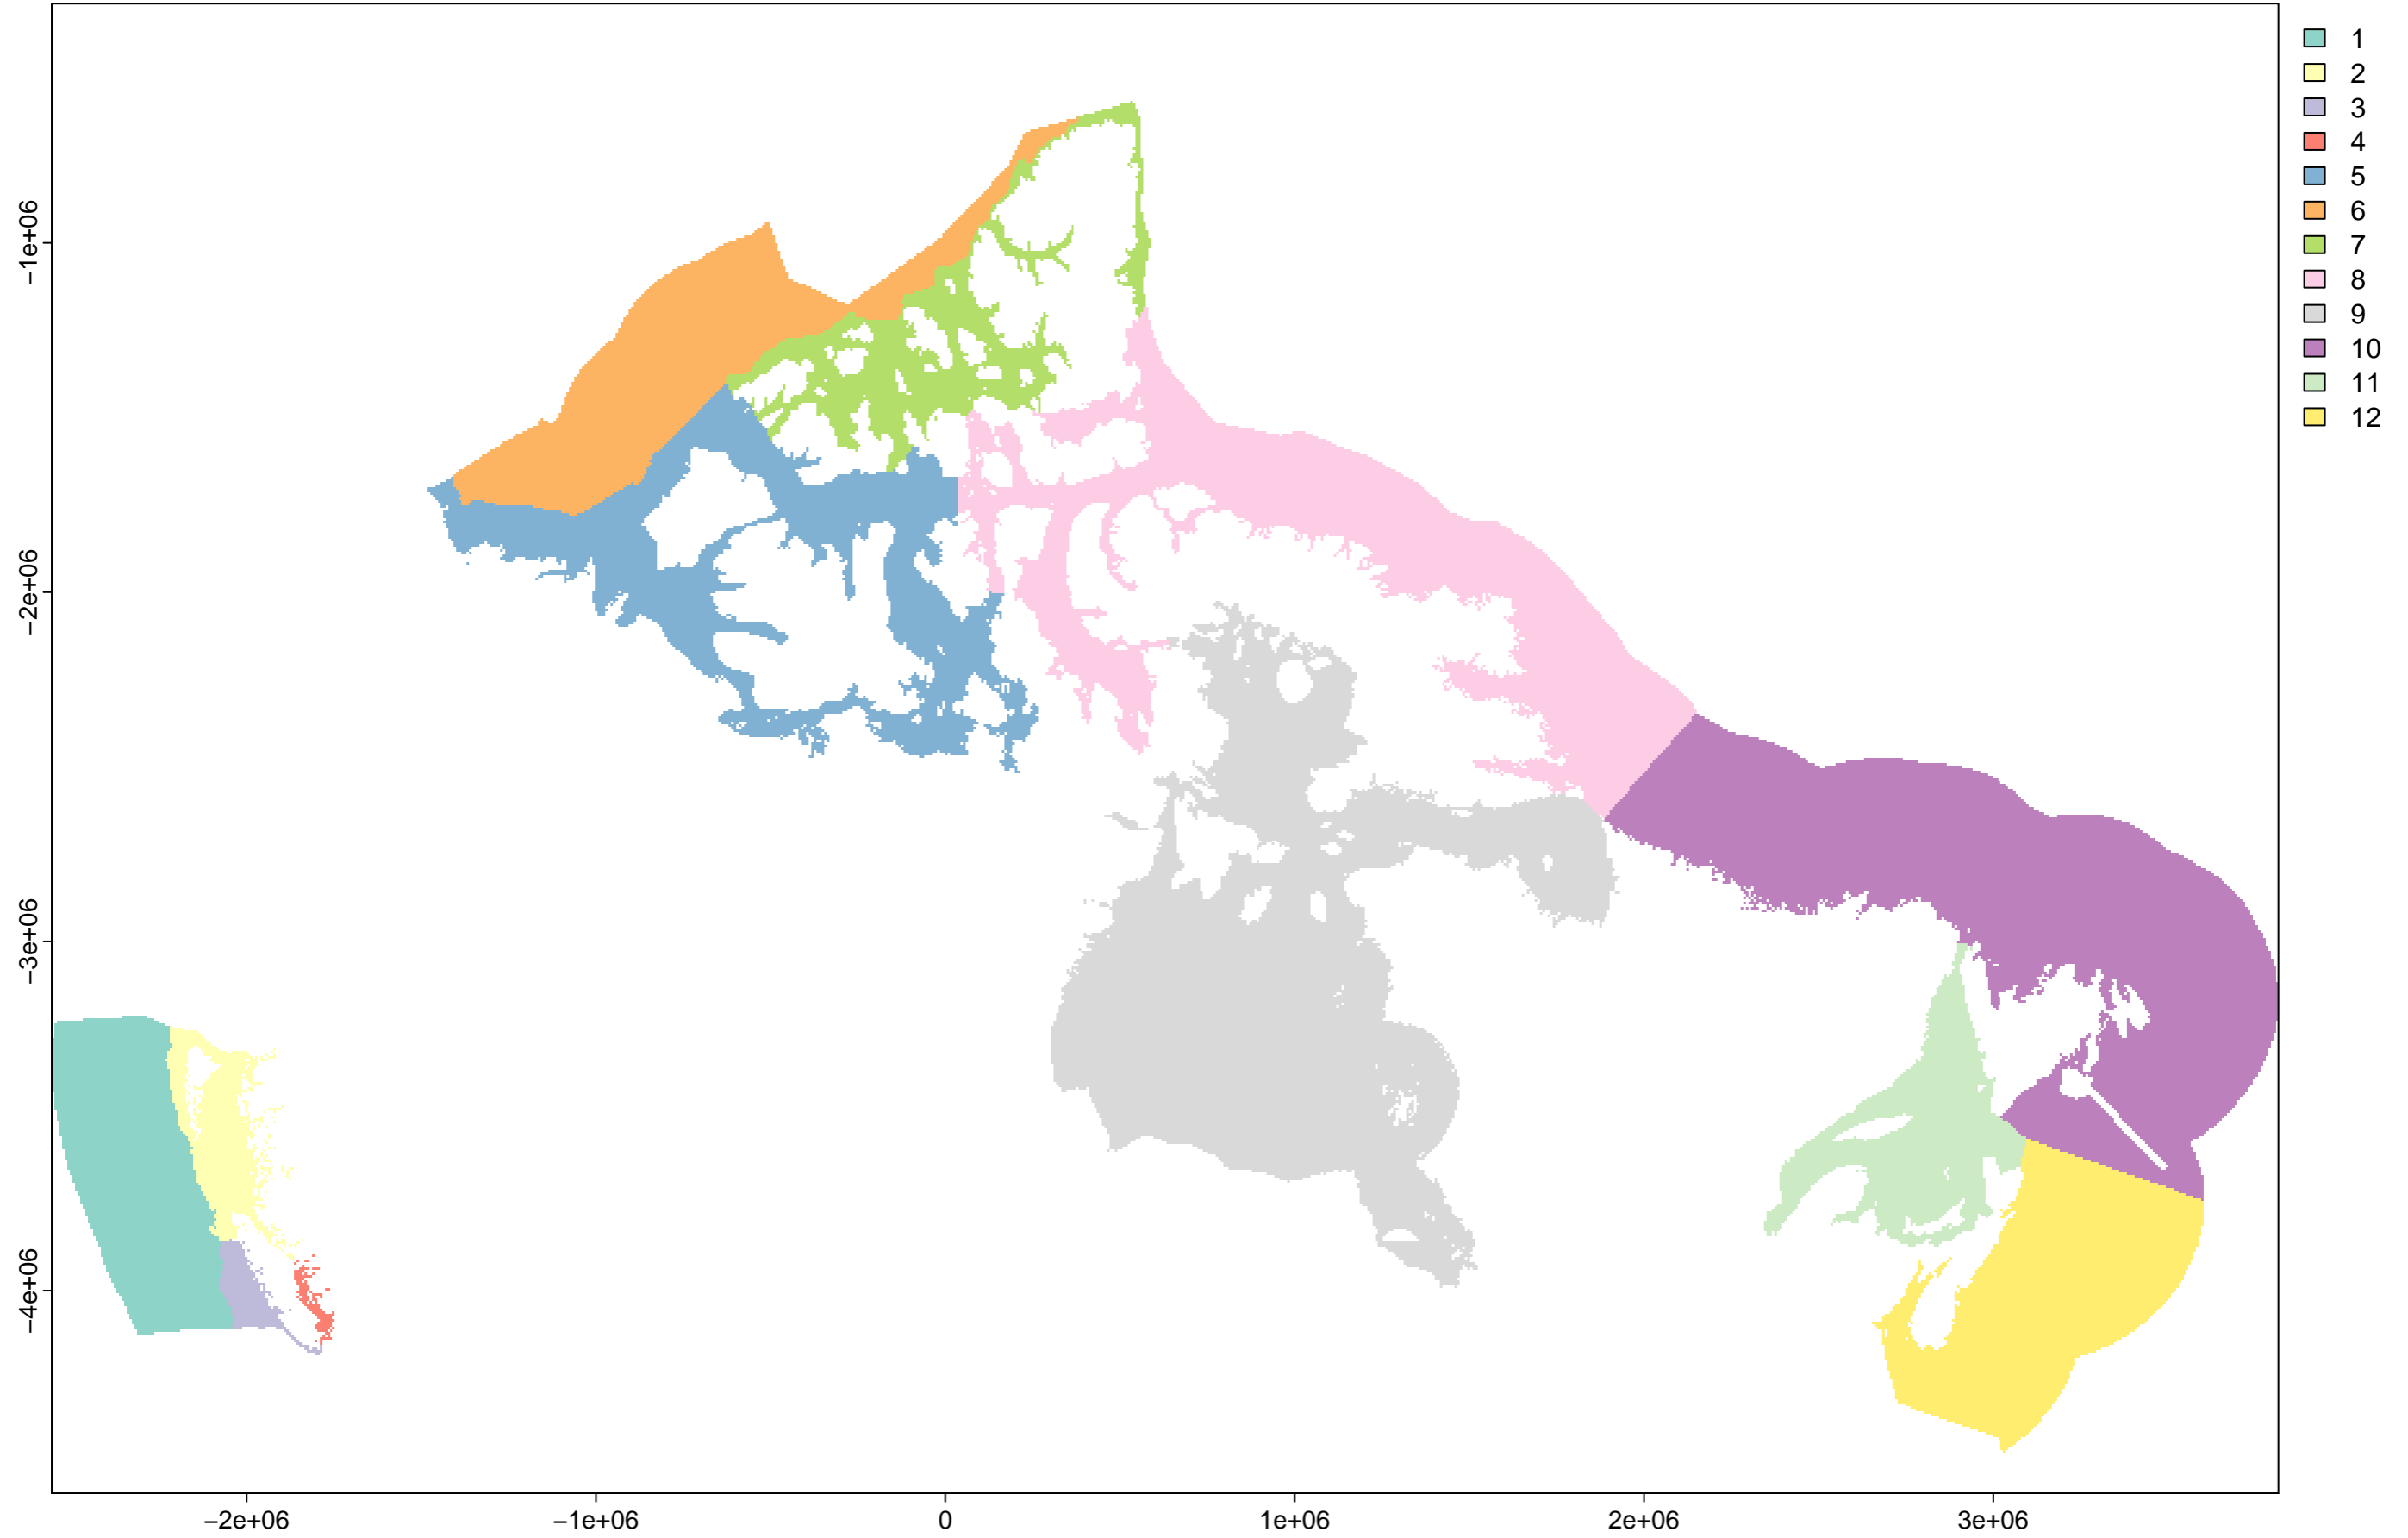

Primary production – surface (g/m<sup>3</sup>/d)

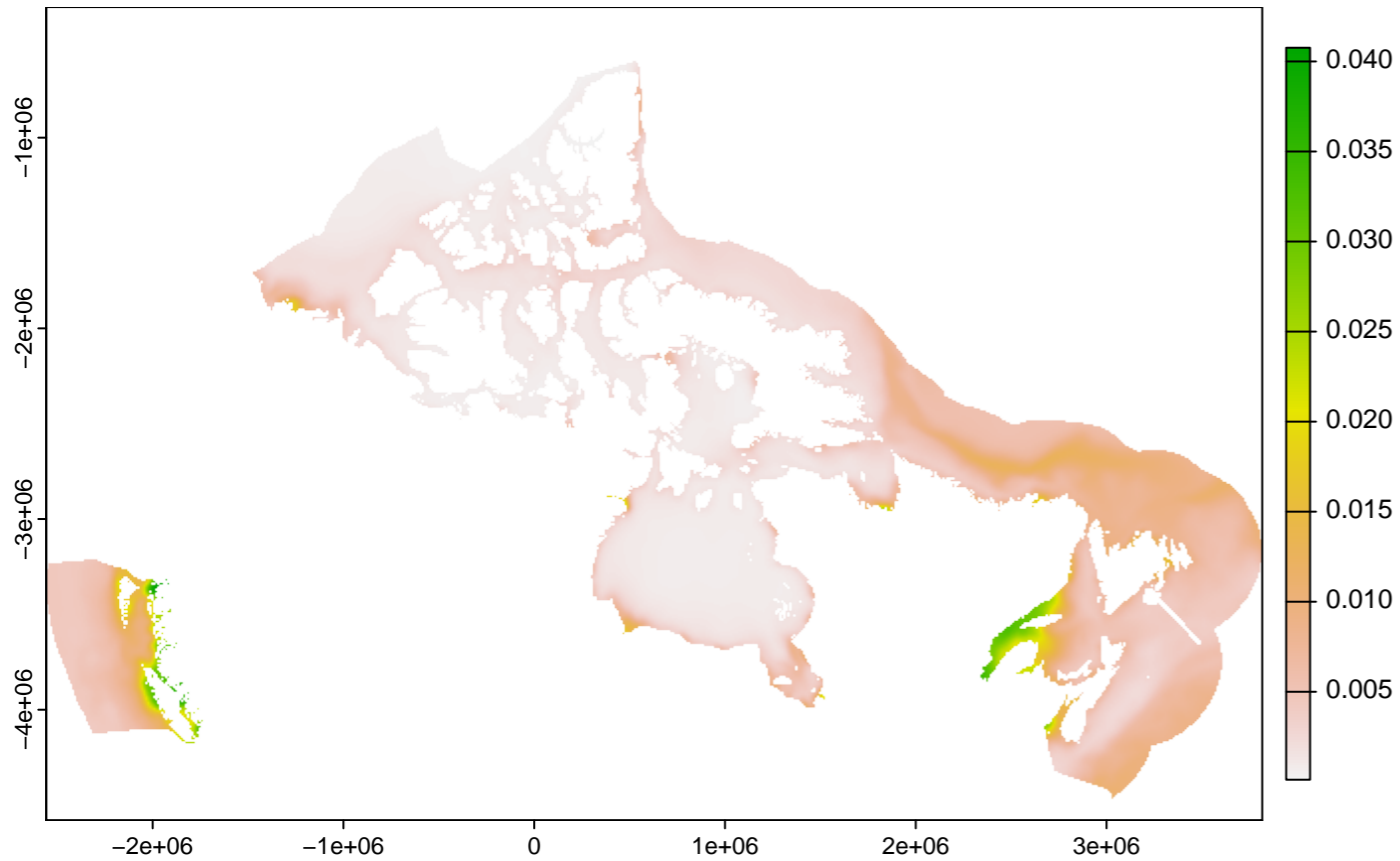

Mean current velocity – seafloor (m/s)

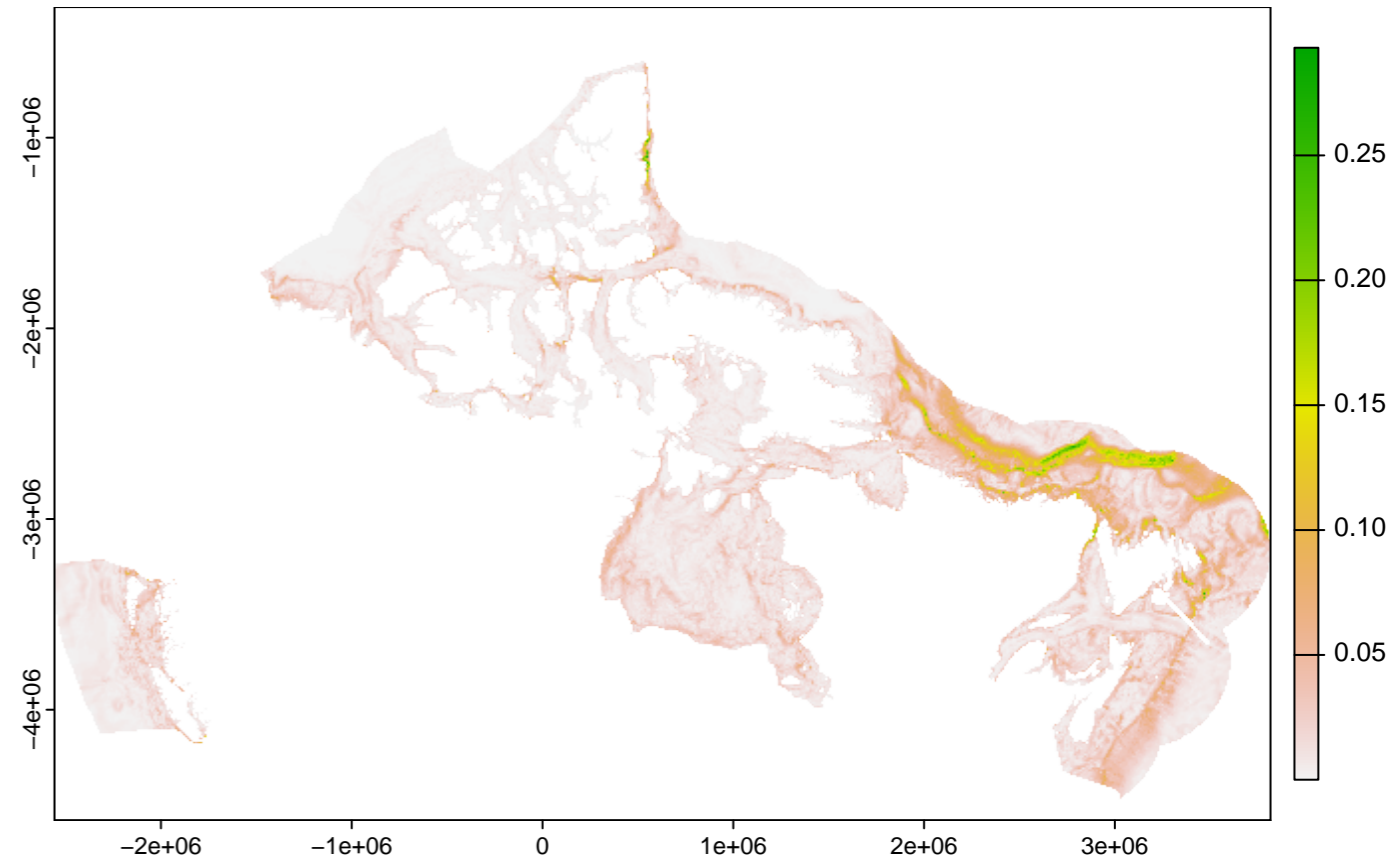

Distance to rivers – broad (m)

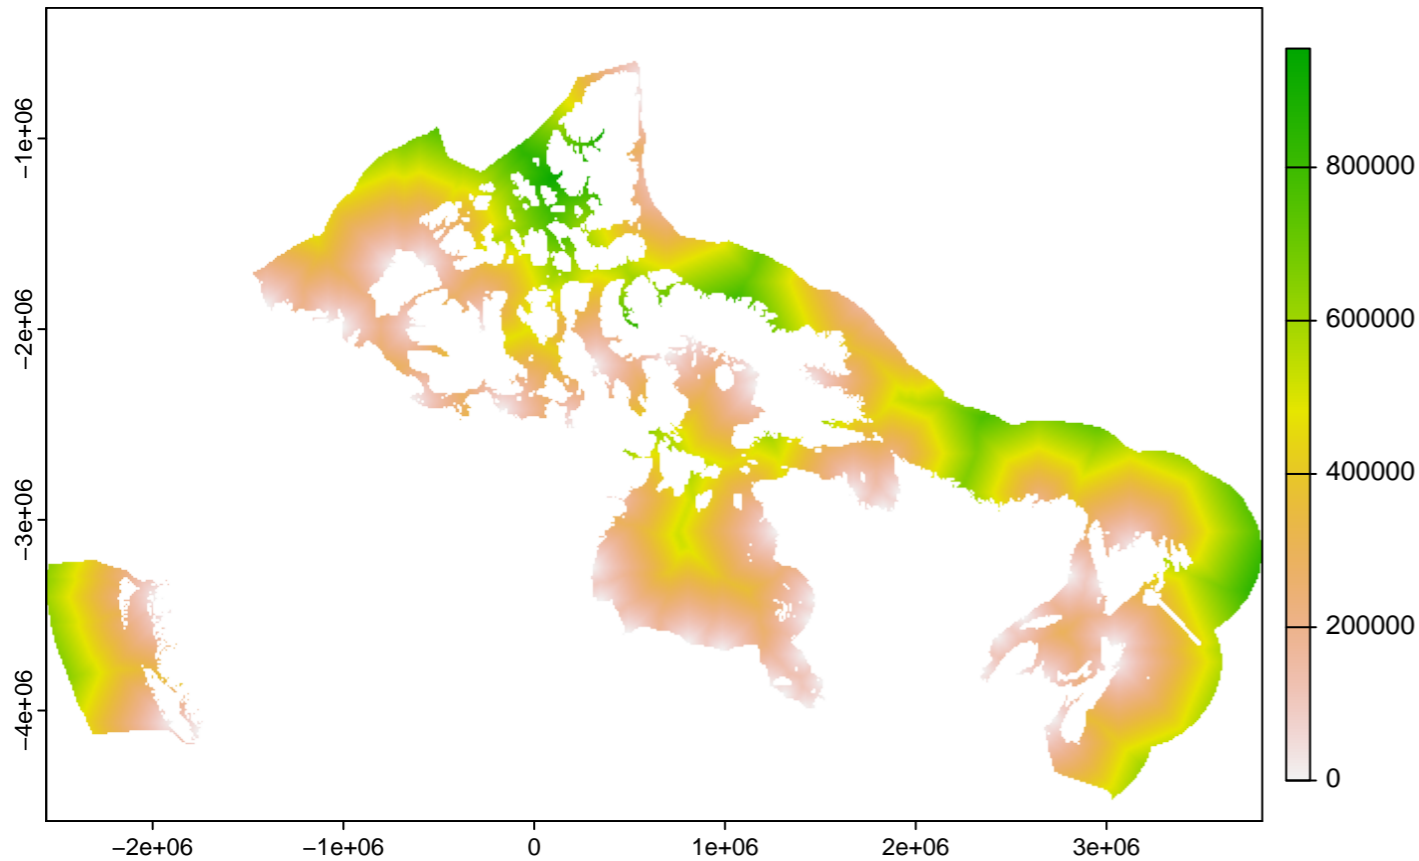

Distance to rivers – fine (m)

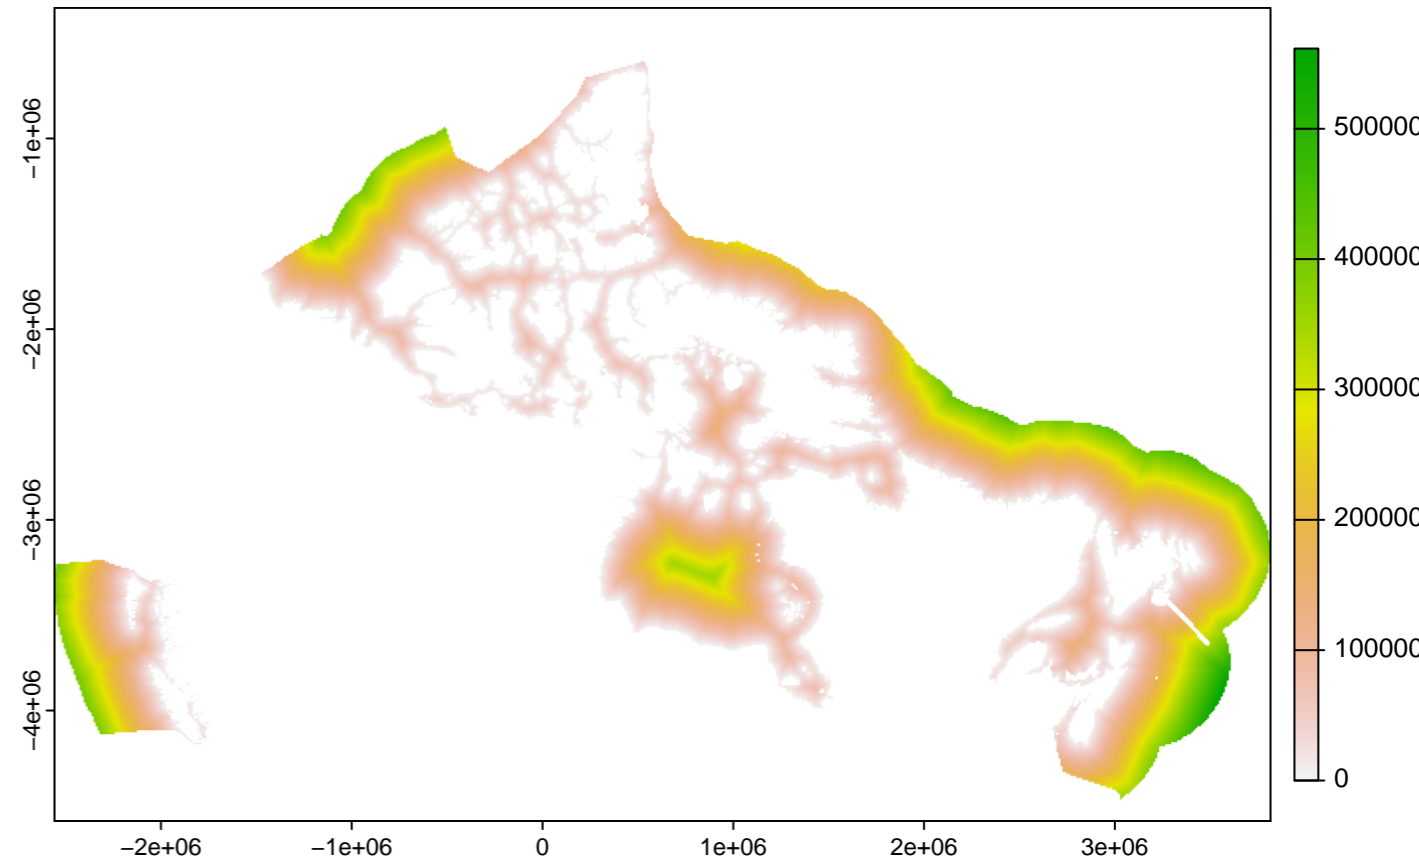

Distance to rivers – medium (m)

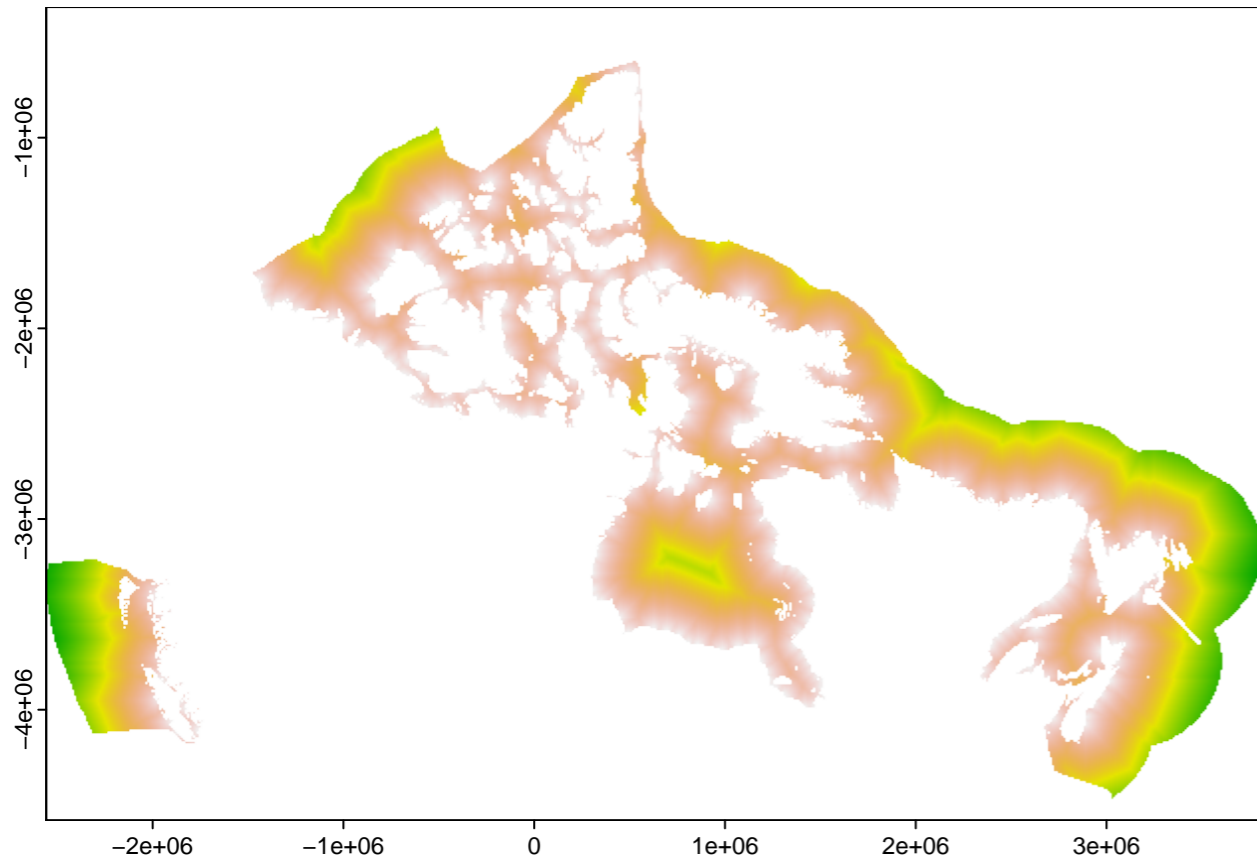

Distance to shore (m)

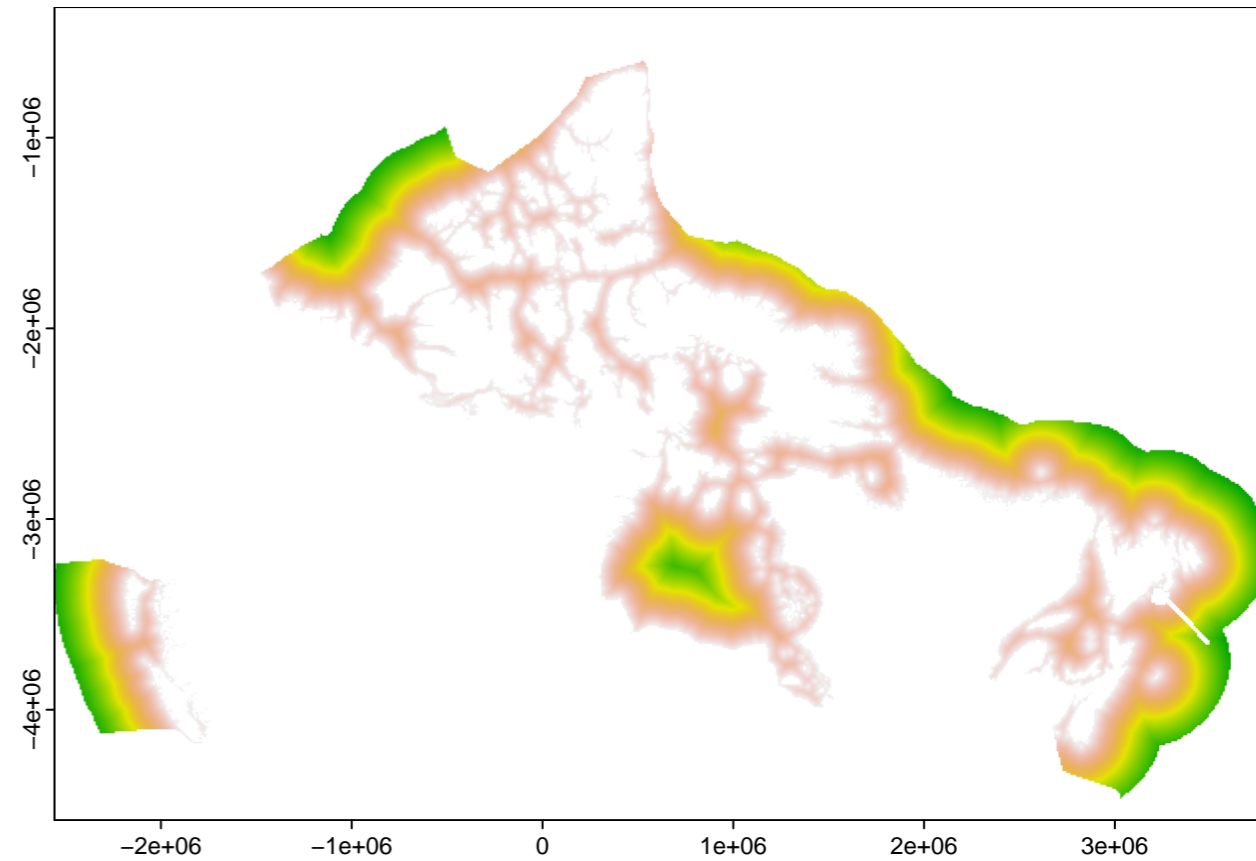

Exposure proxy

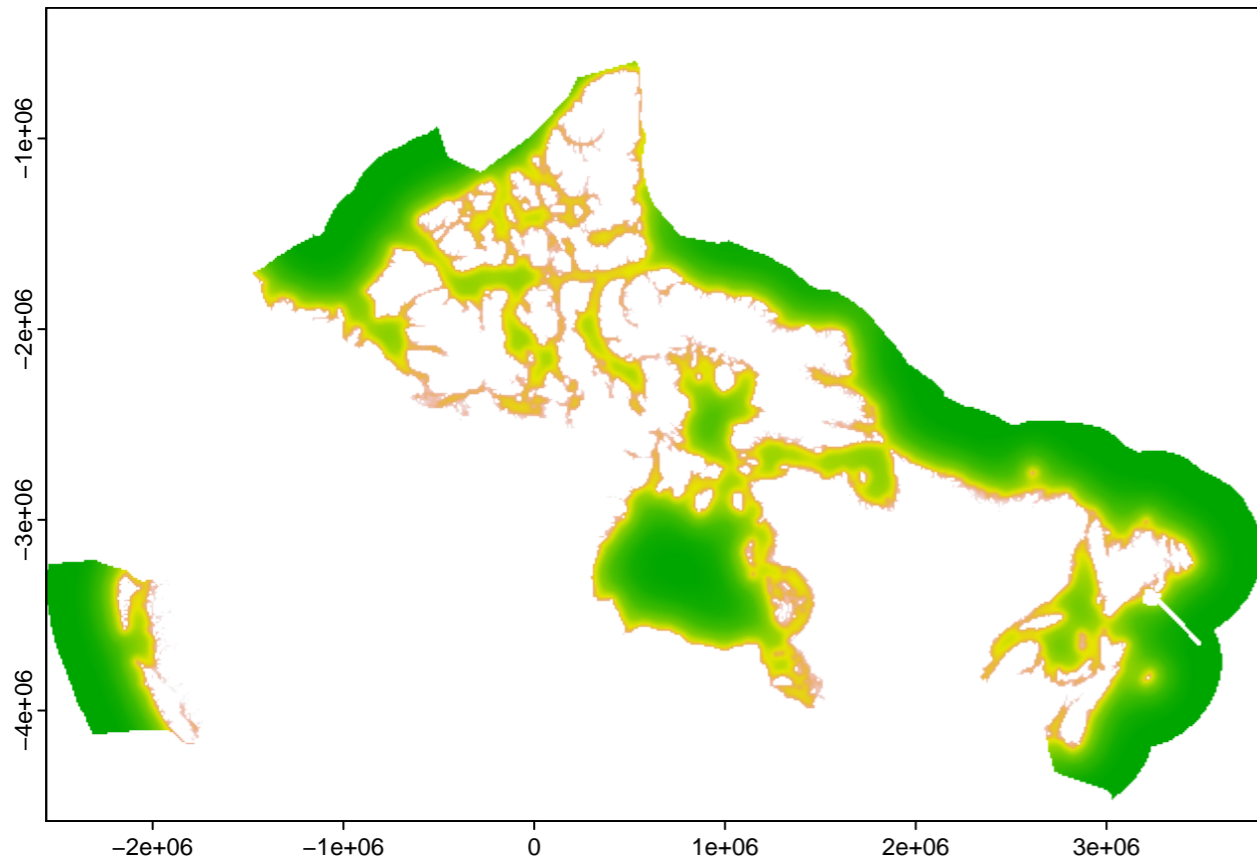

Ice concentration – surface (%)

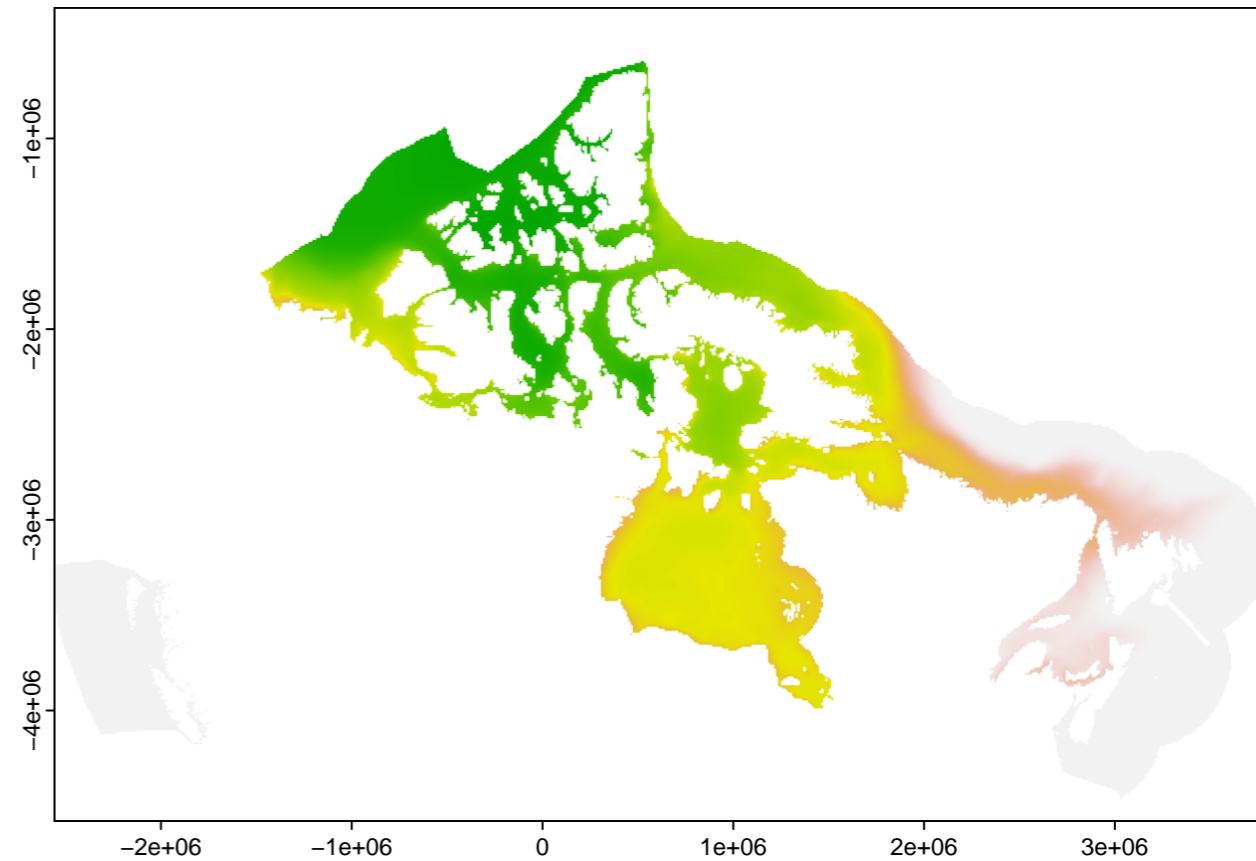



Ice thickness – surface (m)

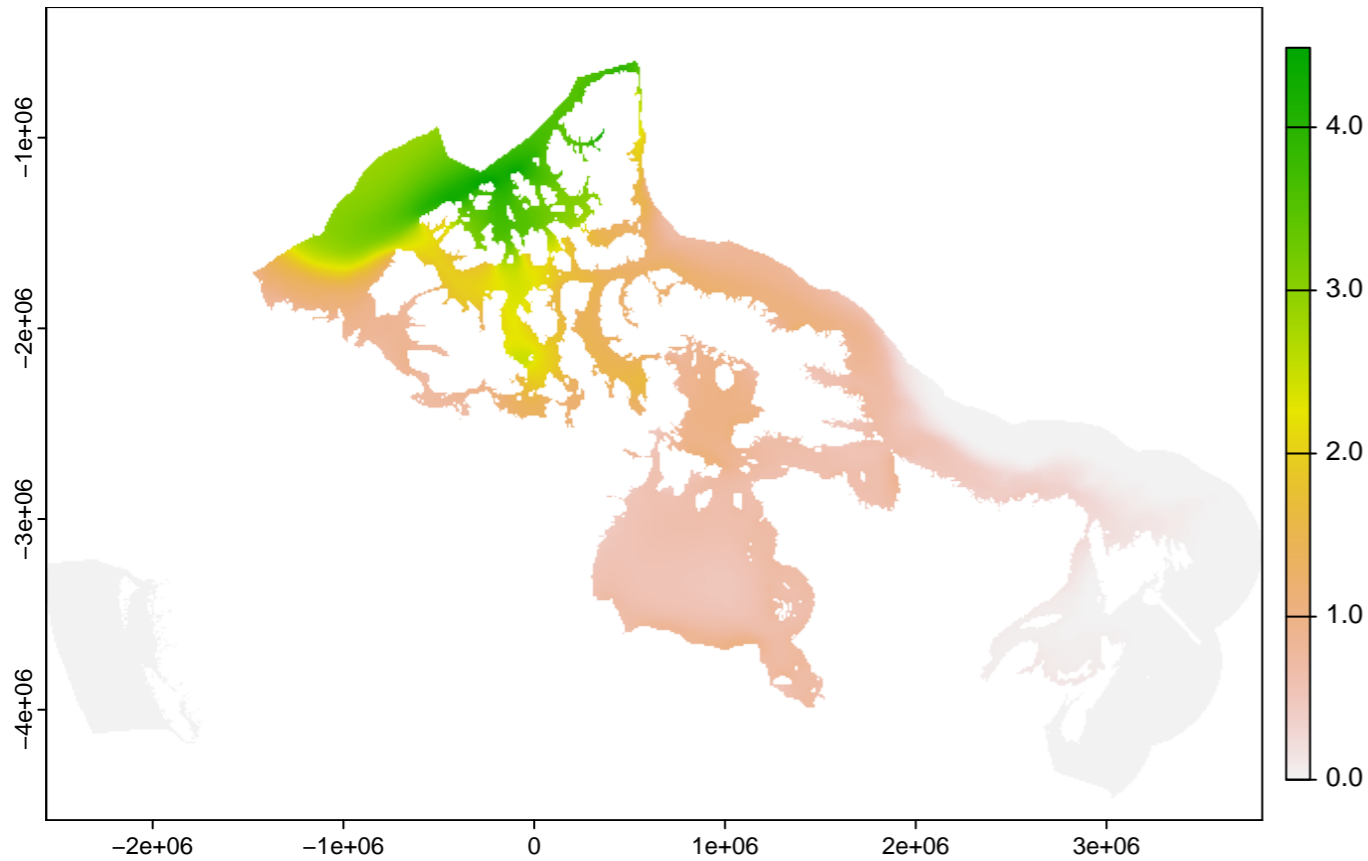

Wave velocity – seafloor (m/s)

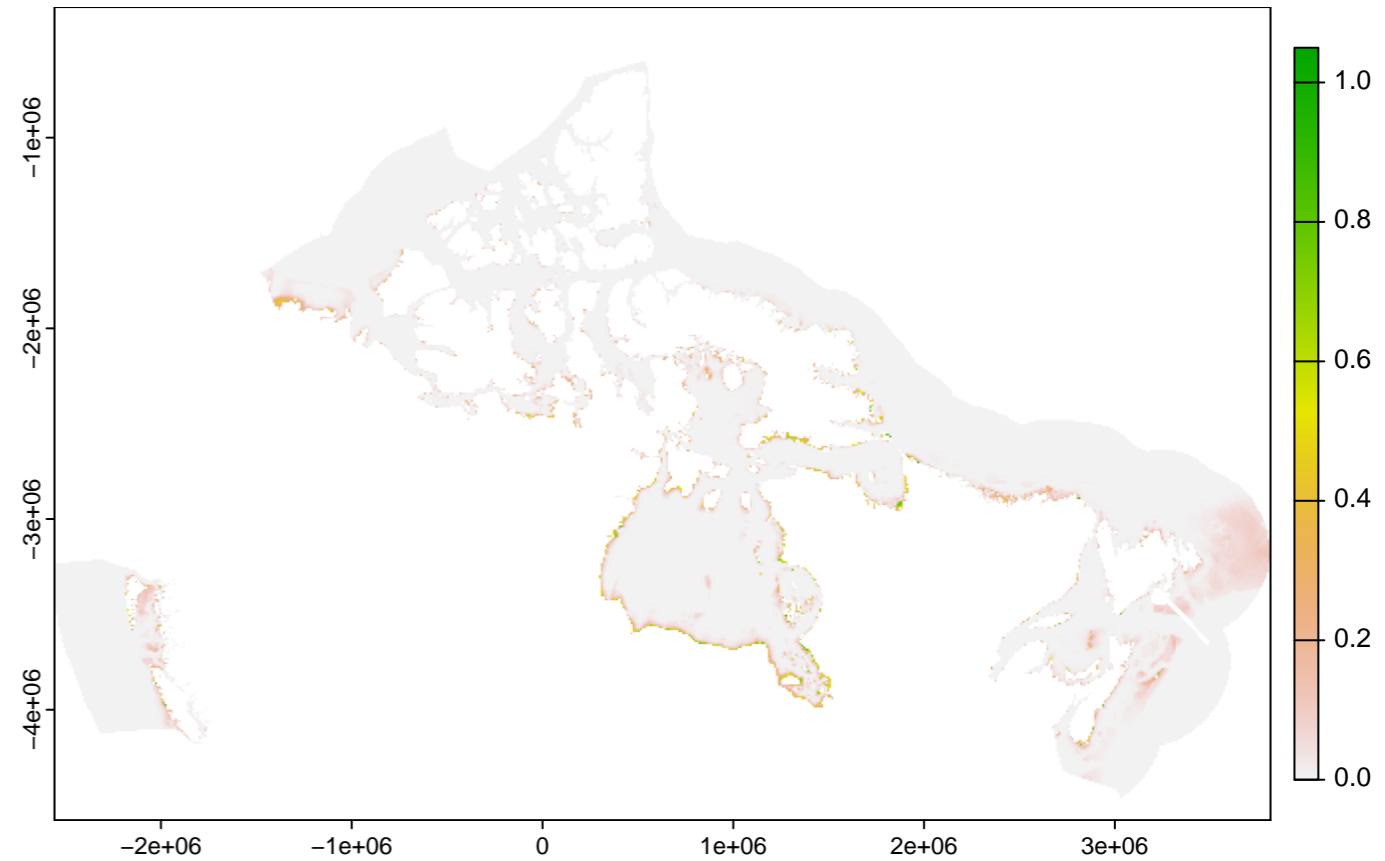

Salinity – seafloor (ppt)

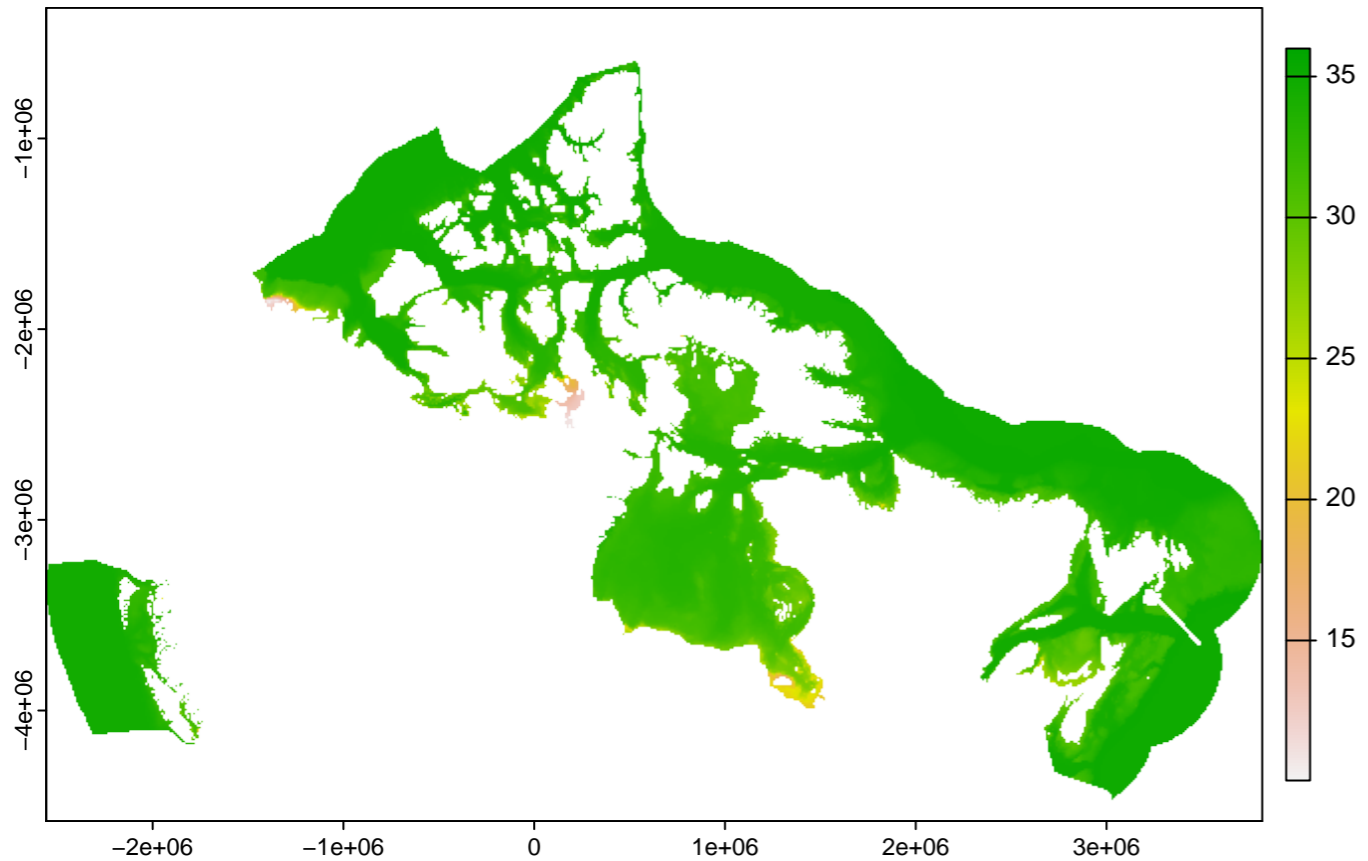

Slope (deg)

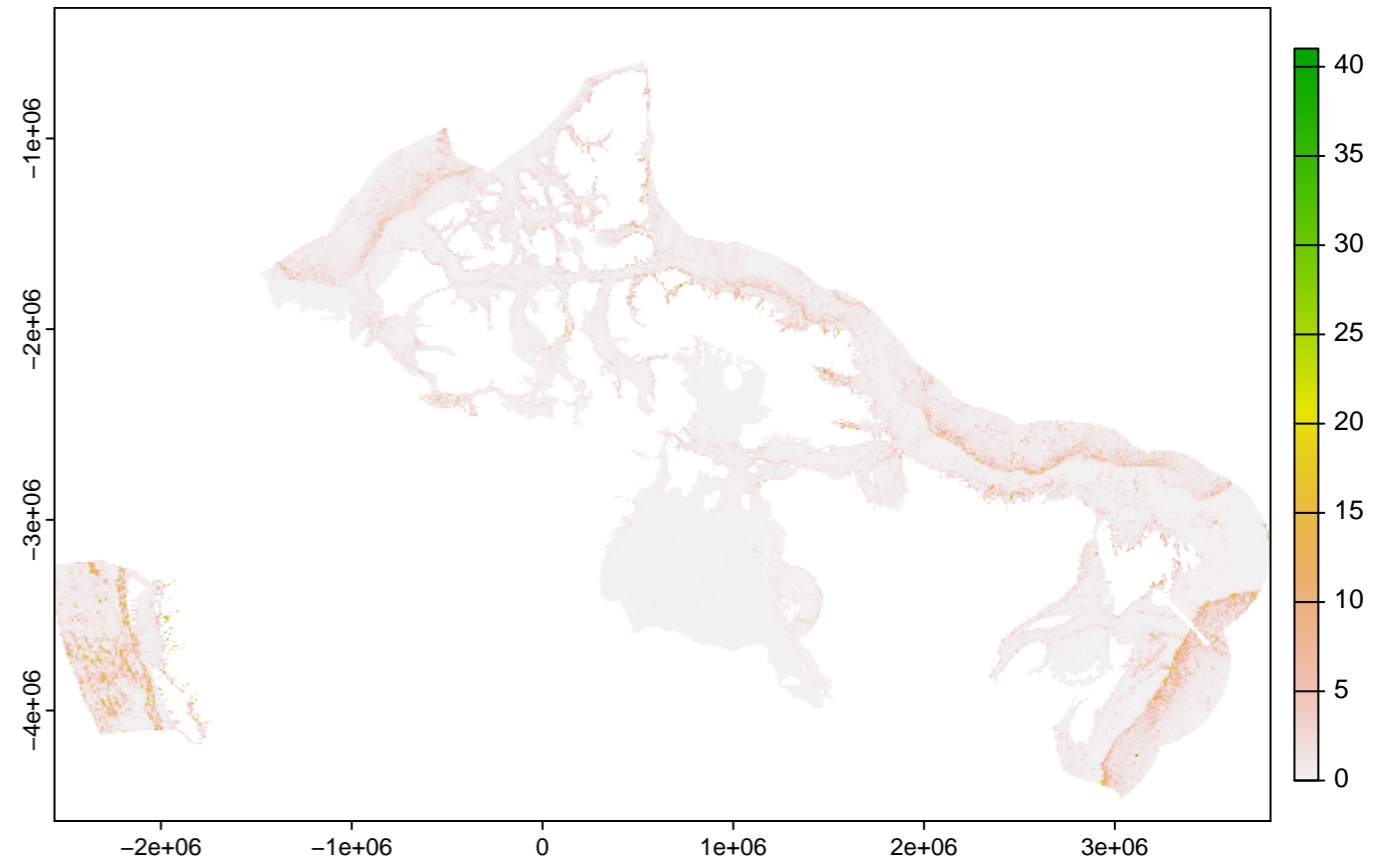

Slope smoothed (deg)

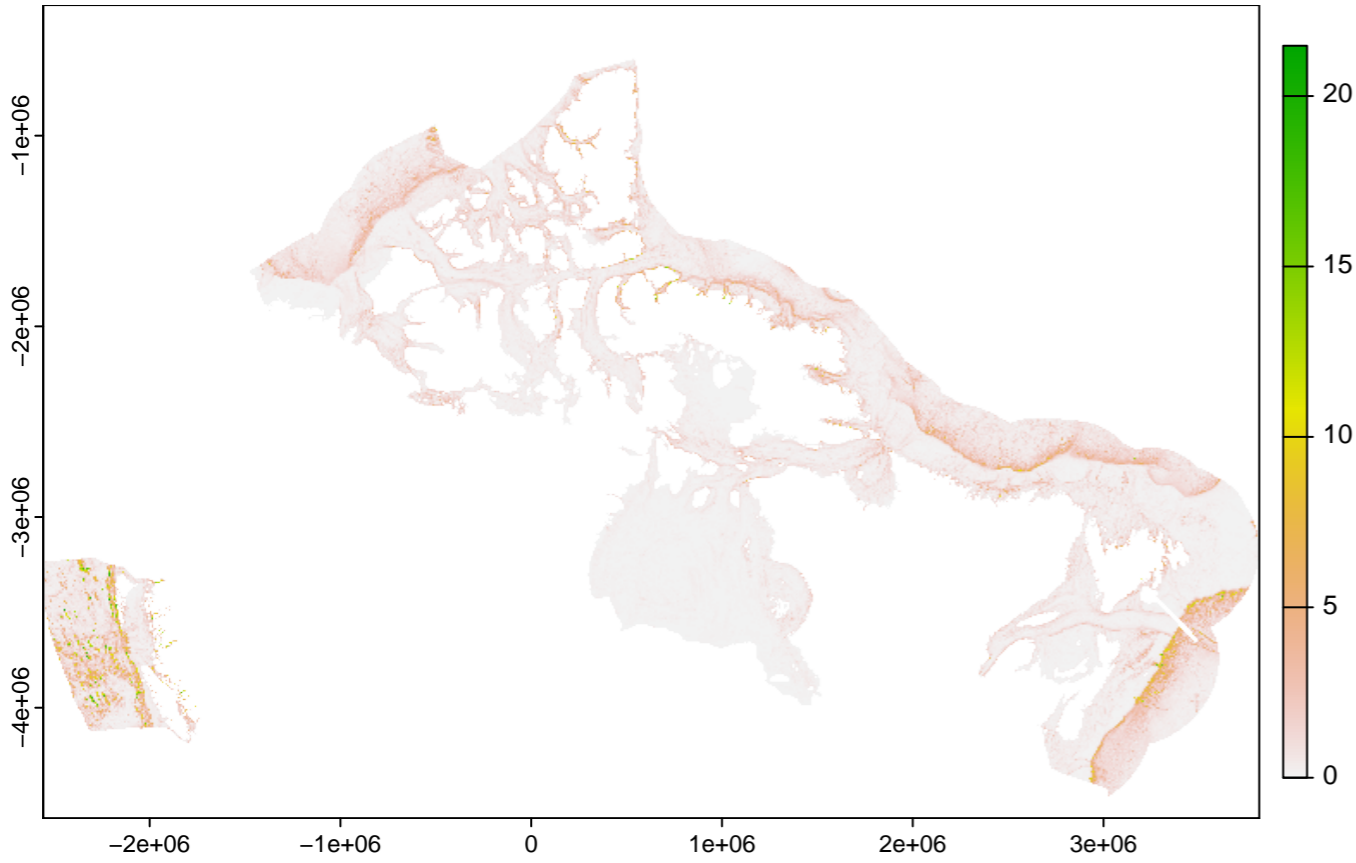

SPM – surface (g/m<sup>3</sup>)

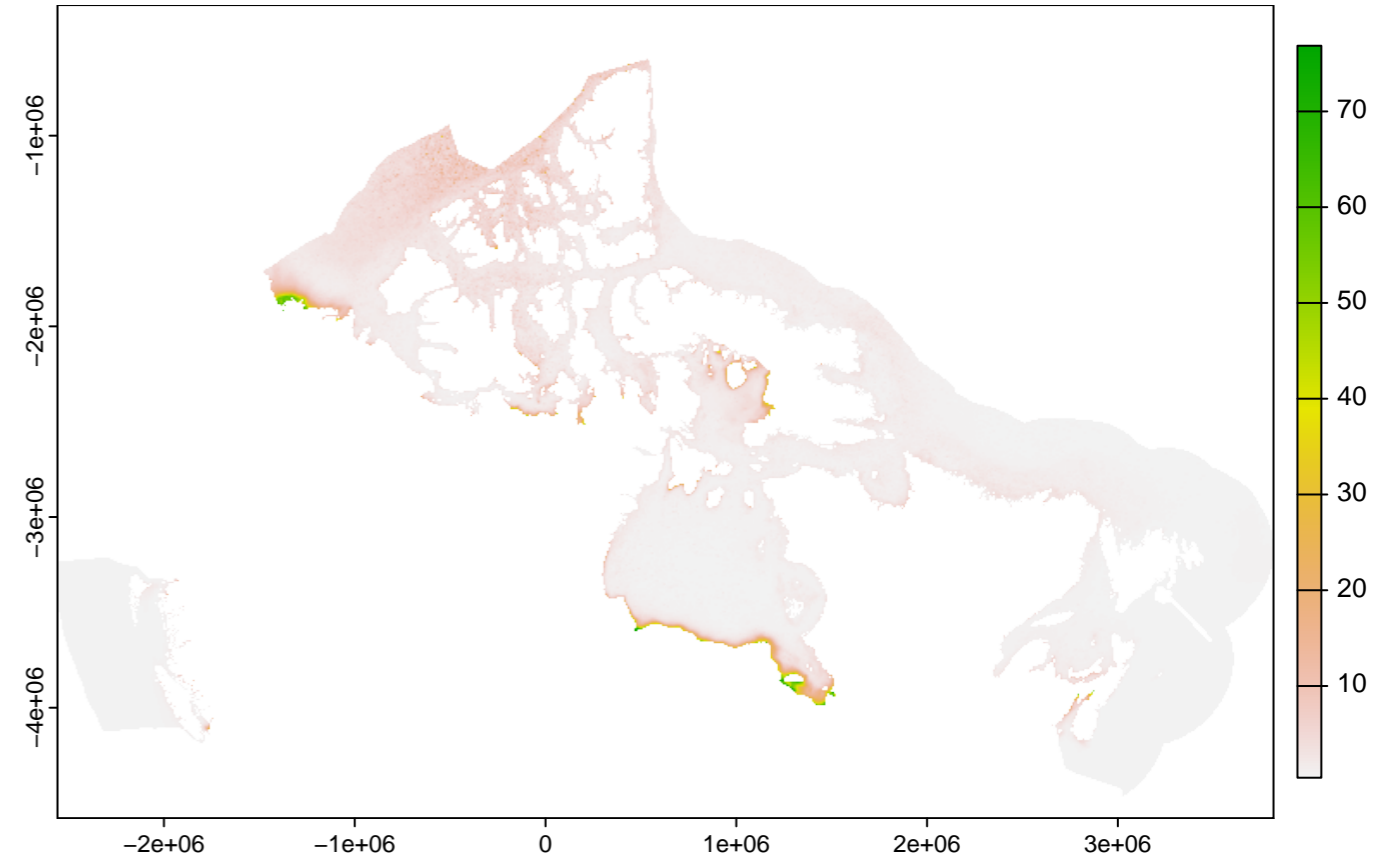

Temperature – seafloor (celcius)

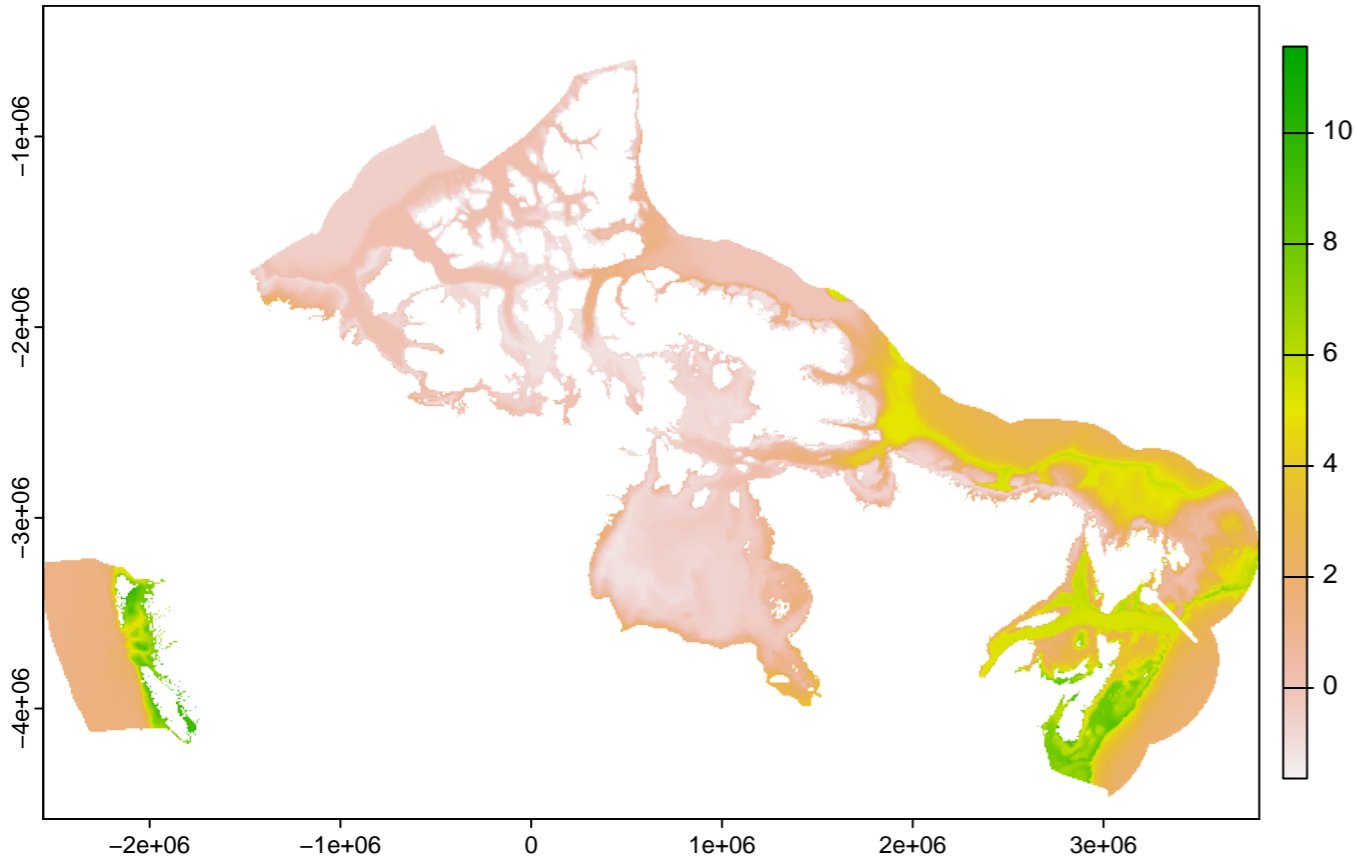

**BPI – broad (m)**

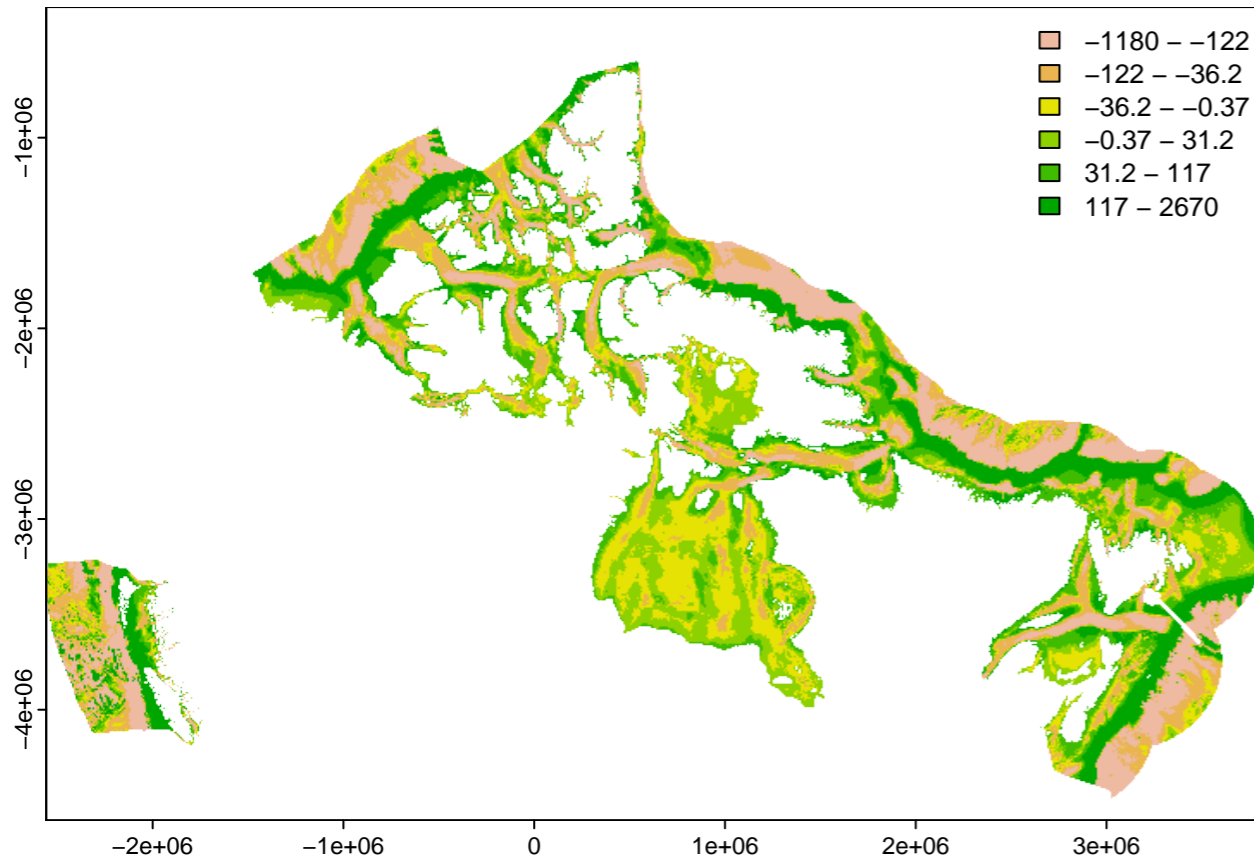

**BPI – fine (m)**

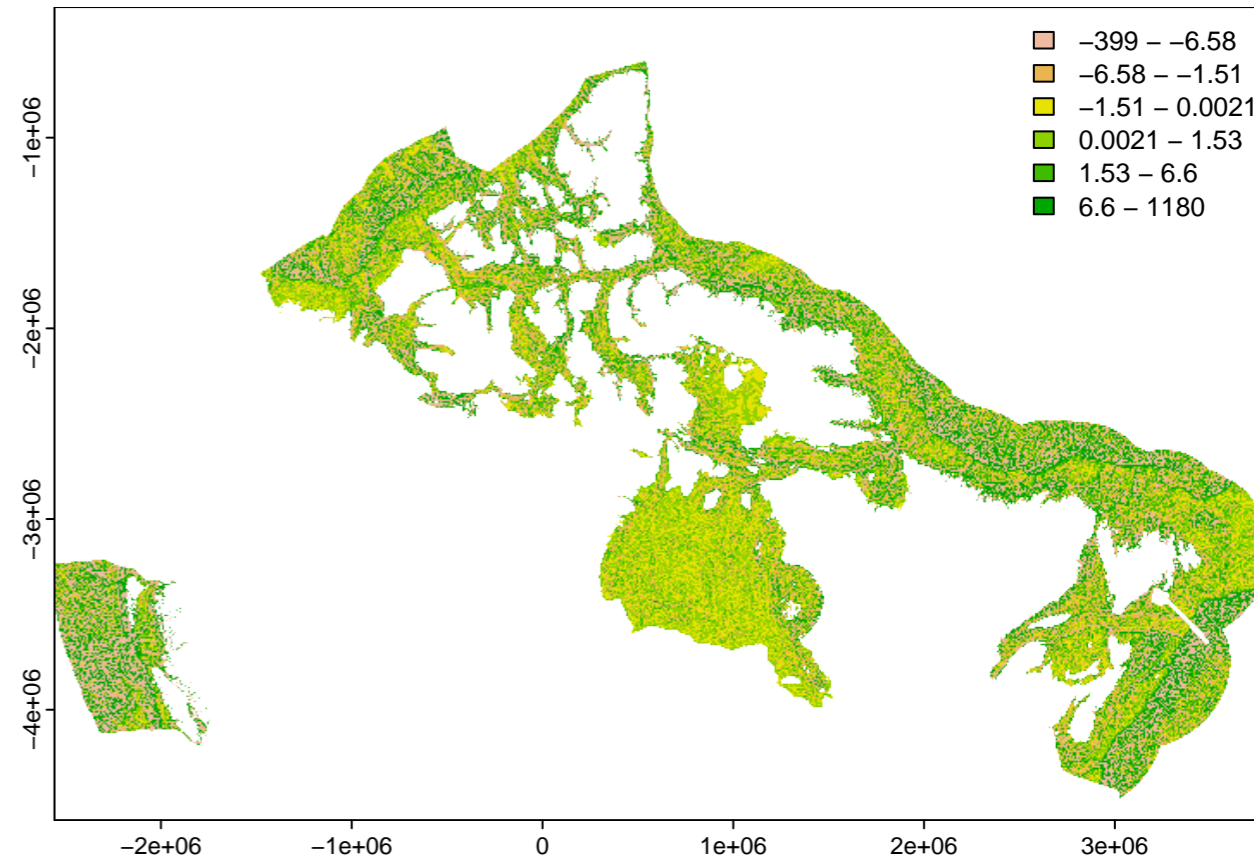

**BPI – medium (m)**

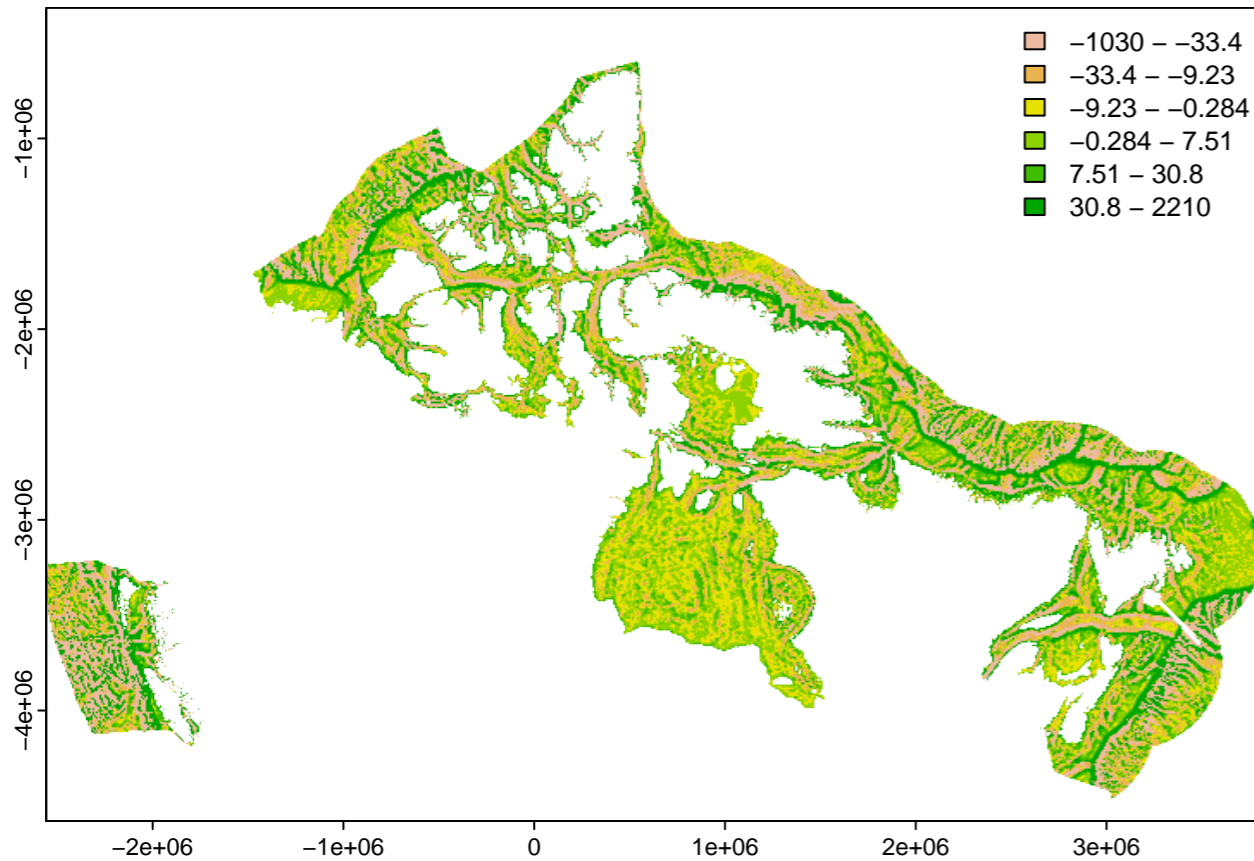



VRM - fine

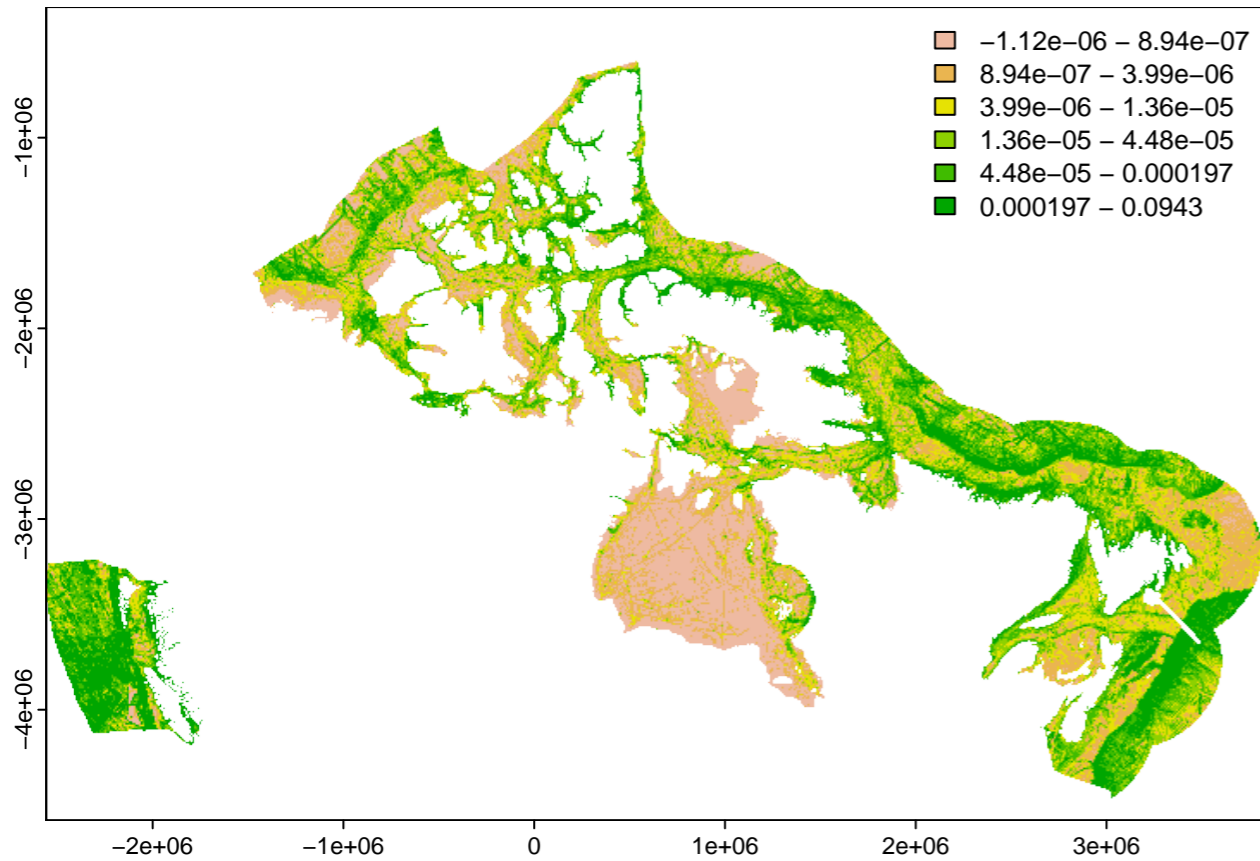

VRM - medium

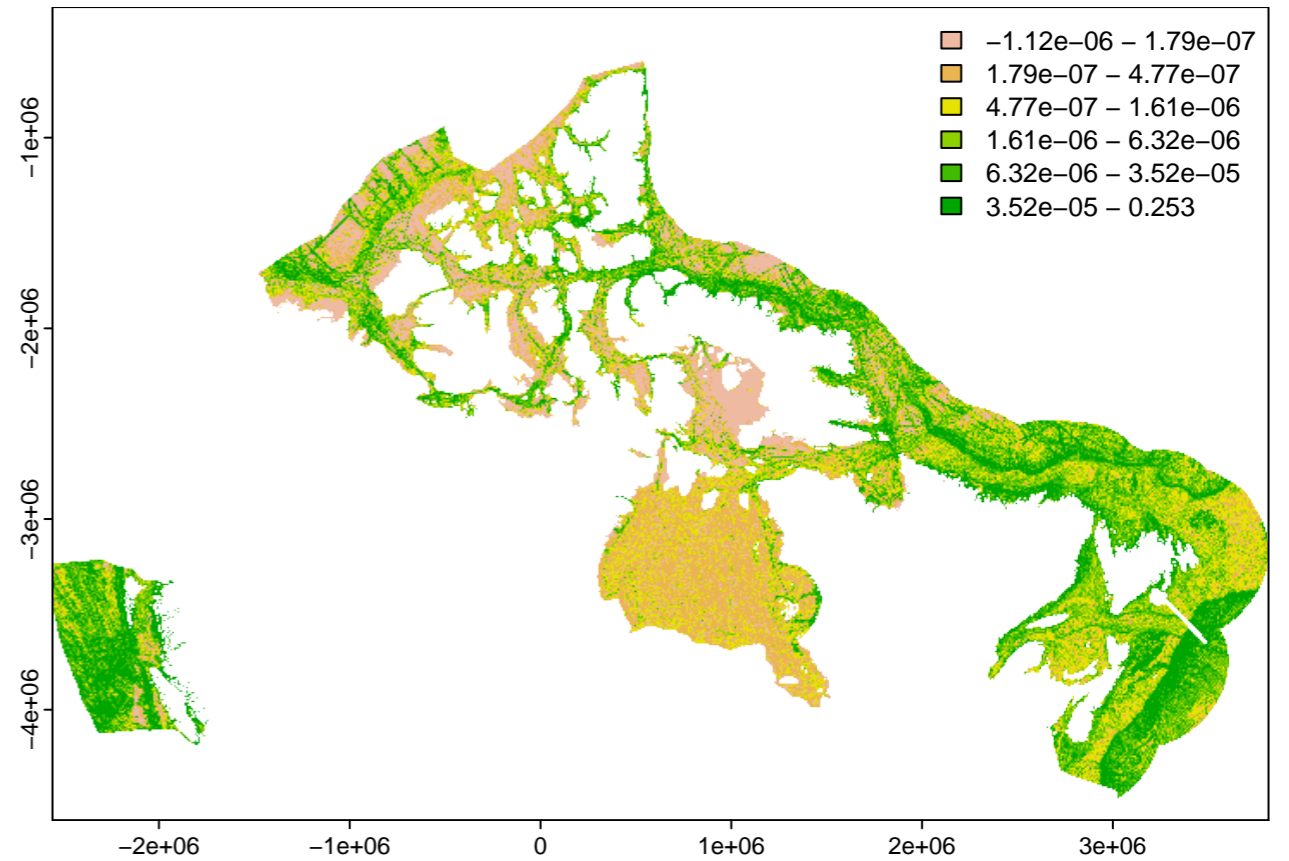

VRM - broad

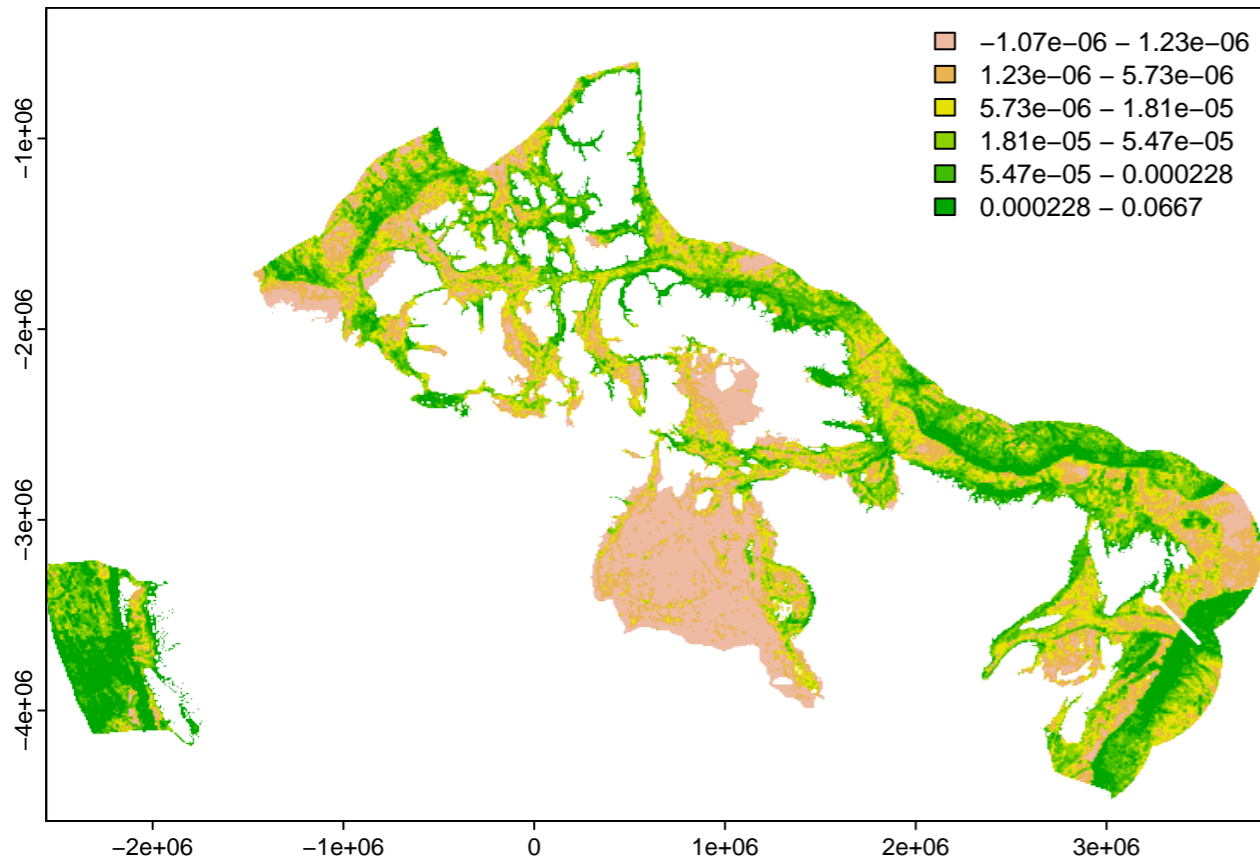

**Total curvature (rad/m)**

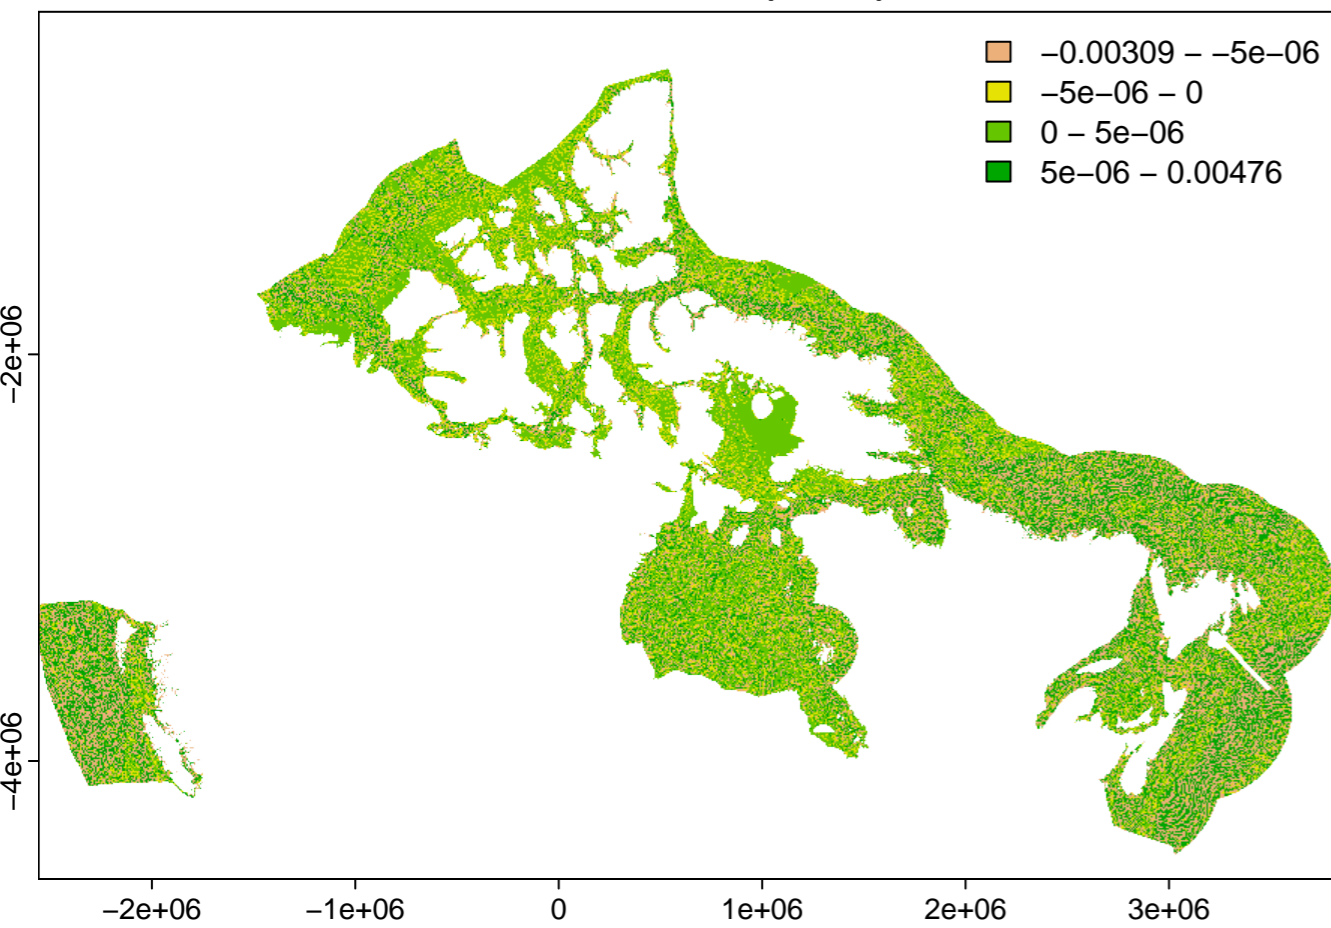

**Total curvature smoothed (rad/m)**

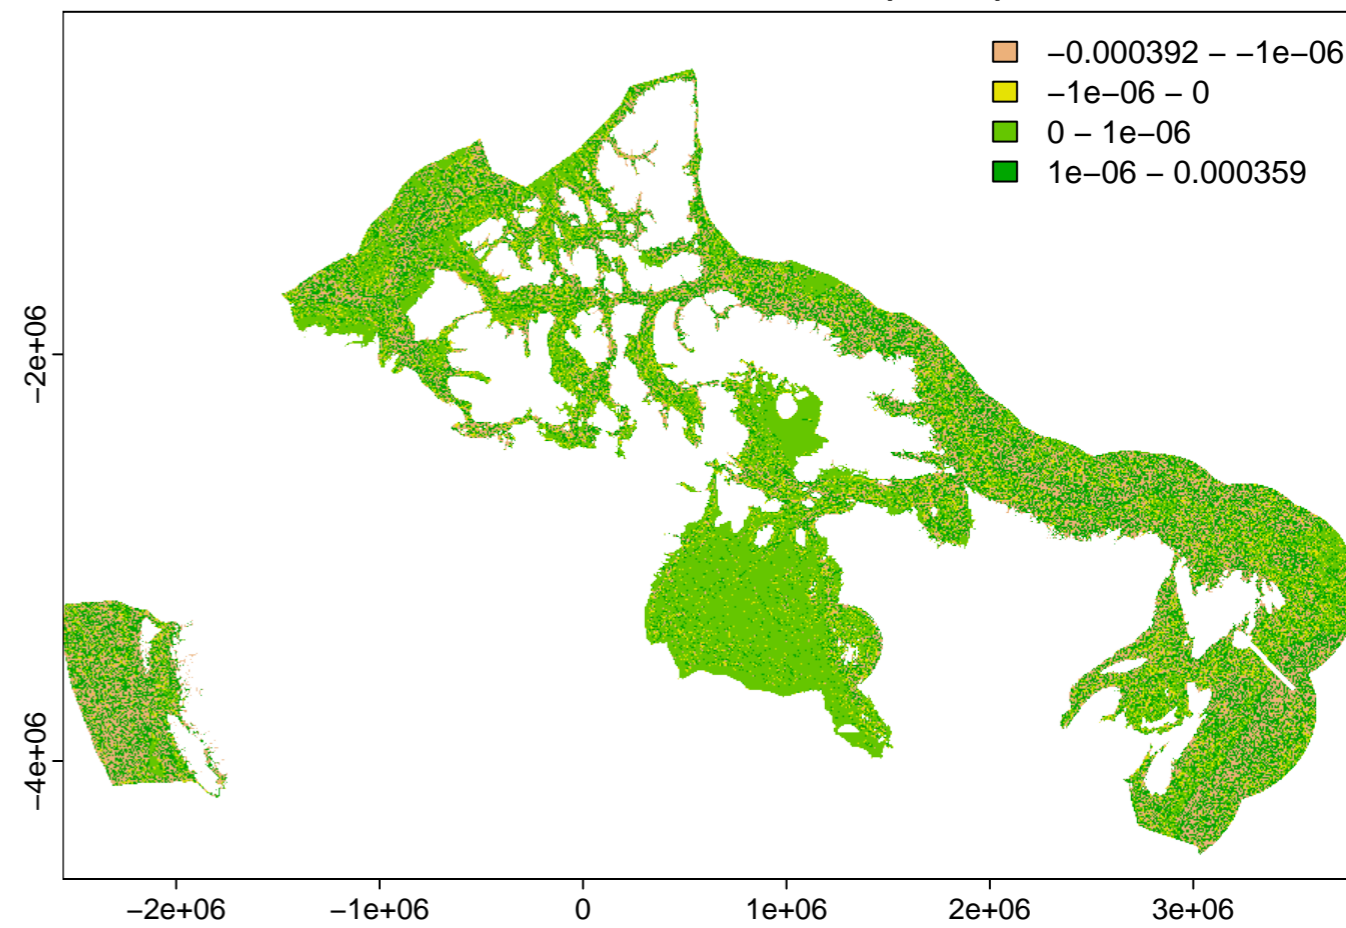

Supplement: Supplementary file 1 [file essd-2023-295-supplement.pdf]
